# Supplementary material for: The Expression Pattern of the Pre-B Cell Receptor Components Correlates with Cellular Stage and Clinical Outcome in Acute Lymphoblastic Leukemia
Source: PLoS One. 2016 Sep 9;11(9):e0162638. doi: 10.1371/journal.pone.0162638 (PMC5017602; doi:10.1371/journal.pone.0162638)
Supplement: S2 File — (XLSX) [file pone.0162638.s008.xlsx]

## Sheet: GSE12995
AAGAB
ACAD8
ACTB
ADARB1
ADCK3
ADK
ADO
AEBP1
AFF2
AIMP2
AKR1B1
ALDH18A1
ALDH1A1
ALDH3A2
ALDH9A1
ANKS1B
ANP32A
ANP32E
AOX1
APBB2
ARF1
ARHGEF11
ARHGEF7
ARHGEF9
ARID4B
ARID4B///RBM34
ARID4B
RBM34
ARL4C
ARPC5
ASIC2
ASPM
ATP5G3
ATP5L
AURKAIP1
AUTS2
BACH2
BCL6
BIK
BLK
BTBD1
BUB1
BUB3
C1orf106
C8orf33
C9orf16
CACNG4
CACYBP
CALD1
CARHSP1
CBFB
CBX1
CCDC81
CD19
CD24
CD58
CD72
CDC20
CDC25B
CDC73
CDK2AP1
CDKN2D
CDO1
CDV3
CENPF
CEP170
CEP350
CERK
CIB1
CKAP5
CKS2
CLTA
COBL
COG2
CORO2B
COX6A1
COX6C
CRYM
CSF2RB
CSRP1
CTCFL///HMGB1
CTCFL
HMGB1
CTNNBL1
CTPS1
CXorf21
CYB5R1
CYCS
CYFIP1
CYFIP2
DACT1
DALRD3
DBI
DCHS2
DDX54
DECR1
DENND1B
DESI2
DGKD
DHX15
DHX9
DIEXF
DOCK10
DOCK9
DPY19L2P2
DTL
DUSP4
DYRK3
EAF2
EBNA1BP2
EHD3
EIF3G
EIF4G2
ELAVL1
ELOVL2
ELOVL5
EMP2
ENDOD1
EPB41L2
EPHA3
EPRS
EXO1
EXTL3
EZR
F13A1
FABP5
FADS1
FAM3C
FAM64A
FAT1
FBXL14
FBXO28
FDPS
FGF9
FH
FHOD3
FLI1
FLI1///EWSR1
FLI1
EWSR1
FNDC3B
GALNT14
GATM
GGPS1
GINS2
GLRX2
GLUL
GNAZ
GNPAT
GOLGA3
GP5
GRAMD4
H2AFV
H2AFZ
H3F3AP4///H3F3A
H3F3AP4
H3F3A
HDAC4
HEATR1
HIP1R
HMGB1
HNRNPA2B1
HNRNPD
HNRNPU
IARS2
IGHM
IGLL1
IGSF3
IL12RB2
IL1B
ING1
INSIG1
INTS7
IPO9
IQCE
IQSEC1
IRF4
ITGA8
ITPKB
KANK1
KCNA3
KCNJ12
KCNJ16
KCNMB3
KIAA0040
KIAA0226
KIAA0247
KIAA0922
KIF14
KIF15
KRAS
LAMA5
LEF1
LMNB2
LOC100290070///KCNJ18///KCNJ12
LOC100290070
KCNJ18
KCNJ12
LPGAT1
LRMP
LRRC15
LSM6
LSM7
LTBP2
MAD1L1
MAGED1
MAGEF1
MAGOH
MAP1A
MAP3K1
MAPKAPK2
MED20
MERTK
METTL13
METTL18
MGAT5
MMD
MRPS14
MTCL1
MYB
MYBPH
MYL12B
NCAPD3
NCBP2
NDUFA4
NDUFAB1
NDUFB3
NDUFS1
NDUFS6
NDUFS8
NEK2
NEK4
NFATC4
NFKB1
NGRN
NID2
NIPA2
NLGN1
NME1
NME7
NOL11
NOTCH2
NRGN
NSG1
NSL1
NSUN5
NUCKS1
NUP133
NUP88
NVL
NYNRIN
ODC1
OPN3
P4HA2
PARP1
PAX5
PBK
PBX1
PCBP3
PDE6D
PDIA6
PHACTR1
PIGC
PIGZ
PIK3R3
PITPNC1
PKM
PLEKHF2
PLGLB1///PLGLB2
PLGLB1
PLGLB2
PLS3
PLXNB1
PNP
POGK
POLE3
POLR3K
POMP
PPFIA4
PPFIBP1
PRDX1
PRDX6
PRKAR1A
PRKCZ
PRKRA
PRL
PRPF4
PSAT1
PSEN2
PSMB3
PSMB7
PSMD14
PSMD6
PTBP2
PTMA
PTPN2
PTPN6
QRSL1
R3HDM1
RABIF
RAN
RASAL1
RCOR3
RGS2
RHOBTB1
RMI1
RNF144A
RNF187
RNPEP
ROBO1
ROR1
RORB
RPA3
RPL39L
RPP30
RRP15
RUVBL2
SACM1L
SAMD4A
SCCPDH
SCP2
SDHAP1
SELT
SEMA4C
SERINC4///ELL3
SERINC4
ELL3
SET
SETX
SGSM3
SH3BP4
SKP1
SLAMF1
SLC15A2
SLC27A2
SLC35D1
SMAP1
SMYD3
SNRPB2
SNRPE
SNRPF
SNRPG
SORBS1
SRGAP2
SRP19
SRP9
SRSF1
SS18L2
SSNA1
STX6
SYNJ2
SYNPO
SYT1
TAF1A
TBCE
TCEB2
TDP2
TEAD4
TENM4
TFAP2C
TFB2M
TGFBR2
THBS4
THYN1
TIMM17A
TIPRL
TJP2
TLE1
TMCO1
TMEM121
TMEM183B///TMEM183A
TMEM183B
TMEM183A
TMEM189-UBE2V1///TMEM189///UBE2V1///RNPEP
TMEM189-UBE2V1
TMEM189
UBE2V1
RNPEP
TMSB15A
TNK2
TOMM20
TOP2A
TOR3A
TP53BP2
TPR
TRAPPC8
TRIB2
TRIM16
TRIM8
TROVE2
TSNAX
TSPO
TSSC1
TST
TTC9
TTF1
TUBA1B
TUBB4B
TWF2
UBAP2L
UCHL5
UCK2
UGT8
UNC119B
UQCRC1
VASH1
VDAC1
WAPAL
WASF1
WBSCR22
WNT16
XRCC6
XYLT1
YPEL1
YWHAQ
ZAP70
ZBTB18
ZFP36L1
ZNF385D
ZNF593
ZNF672

## Sheet: Blood2003
AAGAB
AASS
ABI2
ACAD8
ADAM19
ADAMTS1
ADARB1
ADCK3
ADK
ADRA2A
AFAP1
AFF2
AGGF1
AGO3
AKR1B1
ALDH1A1
ALDH3A2
ALDH9A1
AMBP
AMOT
ANKS1B
ANP32E
AOX1
AP2A2
APBA1
APBB2
AQP5
ARHGEF11
ARHGEF7
ARHGEF9
ARID4B /// RBM34
ARID4B
RBM34
ARL4C
ARNTL2
ARPC5
ASIC2
ASPM
ATP1B1
AUNIP
AUTS2
BACH2
BAMBI
BATF3
BCL6
BIK
BLK
BUB1
BUB3
C11orf49
C1orf106
C6orf123
CACNG4
CACYBP
CALD1
CARHSP1
CASC1
CCBL1
CCDC81
CD247
CD58
CD59
CDC25B
CDC25C
CDC73
CDKN2D
CELSR2
CENPF
CEP170
CEP350
CEP76
CFL1
CKAP4
CKAP5
COCH
COG2
CORO2B
CRYM
CSF2RB
CSRP1
CTNNBL1
CYFIP1
CYFIP2
DACT1
DALRD3
DARS2
DCHS2
DDX54
DENND1B
DESI2
DGKH
DOCK10
DOCK9
DPY19L2P2
DUSP4
E2F8
EAF2
ECT2
EFCAB2
EHD3
ELL3
ELOVL2
ELOVL5
EMP2
ENDOD1
ENSA
EPB41L2
EPHA3
EXO1
EXTL3
EYA4
F13A1
FADS1 /// MIR1908
FADS1
MIR1908
FAM153A /// FAM153B /// FAM153C /// LOC100507387
FAM153A
FAM153B
FAM153C
LOC100507387
FAM3C
FAT1
FBLN1
FBN1
FGF9
FGFR2
FH
FHOD3
FJX1
FLI1
FNDC3B
FSTL1
GALNT14
GATM
GGPS1
GIPC2
GLRX2
GLUL
GNAZ
GNPAT
GOLGA3
GP5
GPATCH2
GPN2
GPR176
GUCY2C
H3F3A /// H3F3AP4 /// H3F3B
H3F3A
H3F3AP4
H3F3B
HDAC4
HDGF
HECW1
HEG1
HIP1R
HMGB1
HMGB1P4 /// HMGB1P4
HMGB1P4
HMP19
IFT27
IFT52
IFT88
IGHG1 /// SKAP2
IGHG1
SKAP2
IGHM
IGHV5-78
IGSF3
IKBKE
IKZF3
IL10
IL12RB2
IL1B
IL7R
ING1
INSIG1
INTS7
IPO9
IQCE
IQSEC1
IRF4
ITGA8
ITPKB
JAM2
JMJD4
KANK1
KCNA3
KCNJ12 /// KCNJ18 /// LOC100996843
KCNJ12
KCNJ18
LOC100996843
KCNJ12 /// LOC100996843
KCNJ12
LOC100996843
KCNJ16
KCNMB3
KHNYN
KIAA0040
KIAA0226
KIAA0247
KIAA0922
KIAA1467
KIF14
KLHL2
KLHL20
KLHL23 /// PHOSPHO2-KLHL23
KLHL23
PHOSPHO2-KLHL23
KRAS
LAMA5
LARP6
LOC100127886
LOC100505991 /// PIGC
LOC100505991
PIGC
LOC100509635
LOC100996341
LOC101060235 /// TMSB15A /// TMSB15B
LOC101060235
TMSB15A
TMSB15B
LRMP
LRRC1
LRRC15
LSM7
LTBP2
MAD1L1
MAGED1
MAGEF1
MAGI1
MAP1A
MAP1B
MAP3K1
MAPKAPK2
MERTK
METTL13
MFI2
MGAT5
MINOS1-NBL1 /// NBL1
MINOS1-NBL1
NBL1
MLLT4
MMD
MRPS14
MS4A2
MSX1
MYB
MYBPH
MYL4
MYT1L
NCAPD3
NCBP2
NEK2
NEK4
NFATC4
NFKB1
NID2
NINJ1
NIPA2
NLGN1
NLK
NME7
NOL11
NOTCH2
NRGN
NSG1
NSL1
NSUN5
NUCKS1
NUP133
NUP88
NVL
NYNRIN
ODC1
OPN3
OTTHUMG00000168848 /// RP11-197N18.8
OTTHUMG00000168848
RP11-197N18.8
P4HA2
PAGR1
PARP1
PAWR
PAX5
PBK
PBLD
PBX1
PCBP3
PCSK5
PDE4D
PDE6D
PHACTR1
PHC2
PHGDH
PIEZO2
PIGZ
PIK3R3
PIP4K2C
PITPNC1
PLEKHF1
PLEKHF2
PLGLA /// PLGLB1 /// PLGLB2
PLGLA
PLGLB1
PLGLB2
PLXNB1
PNP
PODXL
POGK
POU6F2
PPFIA4
PPFIBP1
PPP2R1B
PRDX1
PRDX2
PRKCZ
PRO2964
PRR5
PSAT1
PSEN2
PSRC1
PTBP2
PTPN2
PTTG1
PTTG3P
QRSL1
RAB33A
RABIF
RAPGEF5
RASAL1
RBBP5
RHOBTB1
RHOQ
RNF144A
RNF187
RNPEP
ROBO1
ROR1
RORB
RPA3
RPL39L
RQCD1
SAMD4A
SCCPDH
SEMA4C
SEMA5A
SETX
SGSM3
SH3BP4
SH3PXD2A
SLAMF1
SLC15A2
SLC27A2
SLC2A10
SNRPE
SNRPF
SNTA1
SOGA2
SORBS1
SORBS2
SORT1
SPA17
SPAG6
SPSB1
SRGAP2 /// SRGAP2D
SRGAP2
SRGAP2D
SRP9
SS18L2
ST3GAL2
STX6
SULT2A1
SYNJ2
SYNPO
SYT1
TAF1A
TAF5L
TBCE
TCEB2
TEAD4
TENM4
TFAP2C
TFB2M
TGFBR2
THBS4
THYN1
TIMM17A
TIPRL
TLE1
TMCO1
TMEM121
TMEM183A /// TMEM183B
TMEM183A
TMEM183B
TMEM231
TMEM243
TNK2
TOR3A
TP53BP1
TP53BP2
TPH1
TPR
TRAIP
TRAK2
TRIB2
TRIL
TRIM16
TRIM2
TRIP10
TROVE2
TSPAN2
TSSC1
TST
TTC13
TTC9
TTF1
TUBB2B
TUBB3
UBXN2B
UCHL5
UGT8
VASH1
VASH2
VDAC1
VDR
WASF1
WNT16
WWOX
YPEL1
ZAP70
ZBTB18
ZBTB33
ZFP36L1
ZMAT5
ZNF124
ZNF385D
ZNF672
ZNF674

## Sheet: GSE26281
ACAD8
ACP1
ADAMTS1
ADARB1
ADCK3
AHCTF1
AIDA
AKAP12
AKAP9
AKR1B1
ALDH9A1
AMPD2
ANGEL2
ANKRD10
ANP32E
AOX1
AP2A2
APBB2
ARHGEF9
ARID4B
ARID4B///RBM34
ARID4B
RBM34
ARL4C
ARNTL
ASIC2
ASPM
ATAD2B
ATP5G3
ATP5I
ATP5L
AUTS2
BAMBI
BCL11B
BCL6
BCOR
BIK
BLK
BNIP3
BTBD1
BTG3
BUB1B
BUB3
BUD31
BZW1
CACYBP
CALD1
CARHSP1
CASC3
CBX1
CBX3
CCDC69
CD247
CD58
CDC25A
CDC25B
CDC73
CDH2
CDK2AP1
CDKN2AIP
CDKN2D
CDV3
CEBPG
CENPF
CENPU
CEP170
CERK
CHEK1
CHP1
CKAP4
CLTA
COCH
COX6B1
CRMP1
CRYM
CSF2RB
CTBP2
CTCF
CTNNBL1
CYFIP1
CYFIP2
DCHS2
DDX1
DDX54
DESI2
DGKD
DHX15
DMD
DNA2
DNAJB1
DNMT1
DOCK10
DSTN
DTL
DUSP4
EAF2
EFNB2
EIF4G2
ELOVL2
ELOVL5
EMC8
ENO2
EPB41L2
EPHA3
ERBB2IP
F13A1
FADS1
FAM3C
FAM60A
FAT1
FBXL14
FDX1
FGF9
FH
FHOD3
FLI1
FOXM1
FSTL1
GALNT14
GATM
GLUL
GMEB2
GMPS
GNAS
GNAZ
GNG13
GNPAT
GOLGA3
GOLGA6L9///GOLGA6L5P
GOLGA6L9
GOLGA6L5P
GOLM1
GP5
GPI
H2AFZ
HDAC4
HDGF
HEG1
HIP1R
HJURP
HNRNPR
HSPA14
HSPA1B///HSPA1A
HSPA1B
HSPA1A
IFT52
IGSF3
IL12RB2
ING1
INSIG1
IQCE
IQSEC1
IRF4
ITGA8
ITIH3
ITPKB
JAG1
JAG2
JARID2
KANK1
KCMF1
KCNA3
KCNJ12
KDM1A
KHDRBS1
KIAA0040
KIAA0101
KIAA0226
KIAA0247
KIAA0922
KIF14
KIF15
KIF5C
KIT
KLHL2
KRAS
LAMA5
LDHB
LDLRAD4
LOC100290070///KCNJ18///KCNJ12
LOC100290070
KCNJ18
KCNJ12
LPGAT1
LRIG1
LRMP
LRRC15
LRRFIP1
LSM5
LSM7
MAD1L1
MAGED1
MAGOH
MAP1A
MAP1B
MAP2K3
MAPKAPK2
MAPKAPK5
MELK
MERTK
MGAT5
MGST3
MIOS
MKNK2
MLLT11
MMD
MPC2
MRPL9
MT1F
MT1X
MTCL1
MYBL2
MYBPH
NAP1L1
NCAPD3
NCBP2
NDUFA4
NDUFA6
NDUFS1
NEK2
NEK4
NELL1
NGFRAP1
NGRN
NID2
NINJ1
NINL
NIPA2
NLGN1
NOL11
NOTCH2
NOTCH2NL
NOTCH3
NRGN
NSG1
NTAN1
NUDT11
NUP133
NUPL1
NUSAP1
NVL
NXN
NYNRIN
ODC1
OPN3
PAIP1
PARP1
PAX5
PBK
PBX1
PCNP
PDE2A
PDIA6
PEBP1
PHGDH
PIK3C2A
PITPNC1
PKM
PLEKHF2
PLS3
PNP
POGK
PPFIA4
PPP2R5A
PPP4R1
PRDX2
PRDX6
PRKCZ
PRKRA
PRL
PRPF3
PRR5
PRR5-ARHGAP8///ARHGAP8
PRR5-ARHGAP8
ARHGAP8
PSMB7
PSMD2
PSMD6
PTBP2
PTMA
PTPN2
PXDN
QRSL1
R3HDM1
RAF1
RBM15
RCOR1
RCOR3
RGS2
RHEB
RHOBTB1
RIMS3
RMND5A
RNF187
RNF4
RNPEP
ROBO1
ROR1
RORB
RPL10///NDUFS5
RPL10
NDUFS5
RPP30
RQCD1
SAE1
SAMD4A
SCCPDH
SCRN1
SDC1
SDHA
SDHAP1
SEMA4C
2016-09-08
SF3B2
SGSM3
SH3BP4
SHCBP1
SIAH2
SLAMF1
SLC27A2
SMAP1
SMARCA4
SMYD3
SNN
SNRNP200
SNRPA1
SNRPB2
SNRPE
SNRPF
SORBS1
SORBS2
SOX11
SPNS1///LAT
SPNS1
LAT
SPTBN2
SREK1
SRGAP2
SRP14
SRP9
SRRT
SS18L2
STAU1
STK39
SUGP1
SUN2
SYF2
SYNJ2
SYNPO
SYT1
SYT11
TACC2
TBCE
TEAD4
TENM4
TFAP2C
TFB2M
TGFBR2
THBS4
TIMM17A
TIMP2
TMCO1
TMEM121
TMEM183B///TMEM183A
TMEM183B
TMEM183A
TMEM189-UBE2V1///TMEM189///UBE2V1///RNPEP
TMEM189-UBE2V1
TMEM189
UBE2V1
RNPEP
TMSB15A
TMX4
TNK2
TOMM20
TOPBP1
TOR3A
TP53BP1
TP53BP2
TP53I11
TRAK1
TRIB2
TRIM44
TROVE2
TSNAX
TSPO
TSSC1
TTF1
TTK
TUBA1A
TUBB2A
TUBB3
TUBB4B
UAP1
UBAP2L
UBE2D2
UBE3A
UCHL1
UCHL5
UCK2
UCKL1
UNC119B
UQCRH
USP39
USP47
VASH2
VIPR2
WAPAL
WDR26
WDR60
WDR82
WIPI2
WNT16
XRCC5
YTHDF1
YWHAQ
ZBTB18
ZFP36L1
ZHX2
ZNF184
ZNF432

## Sheet: GSE17703
AAGAB
AASS
ABCB4
ACAD8
ACOX3
ADAM19
ADAMTS1
ADARB1
ADK
AEBP1
AFF2
AGO3
AIDA
AKR1B1
ALDH1A1
ALDH9A1
ANAPC1
ANGPT2
ANKRD10
ANKS1B
ANP32A
ANXA6
AOX1
AP2A2
AP3B1
AP3S2
APBB2
APITD1
ARHGEF7
ARHGEF9
ARID4B///RBM34
ARID4B
RBM34
ARL4C
ARPC1A
ARPC5
ASIC2
ASNA1
ASPM
AVEN
BACH2
BCL11B
BIK
BLK
BSPRY
BUB1
BUB3
C11orf49
C1orf106
C1orf112
C6orf123
CACYBP
CARHSP1
CBX1
CCBL1
CCDC81
CD247
CD38
CD58
CD72
CD84
CDC25B
CDC73
CDCA8
CDKN2D
CDO1
CENPF
CENPJ
CENPM
CENPU
CERK
CFAP44
CHCHD2
CHEK1
CIB1
CKAP5
CKS2
CLEC2D
CLTA
CLTC
CNR1
COBL
COG2
COPS8
CRYM
CSF2RB
CTCFL///HMGB1
CTCFL
HMGB1
CTNNBL1
CYFIP1
CYFIP2
DACT1
DARS2
DBF4
DCHS2
DCPS
DDB1
DDX54
DECR1
DENND1A
DESI2
DHX40
DLG1
DLGAP5
DMD
DNAJC7
DNM1L
DOCK10
DOCK9
DPY19L2P2
DYNC2LI1
E2F2
E2F5
EAF2
EHBP1L1
EHMT1
EID1
ELAVL1
ELOVL2
ELOVL5
EMC8
ENDOD1
EPB41L2
EPRS
EXO1
EXTL3
F13A1
FAM3C
FAT1
FDX1
FGF9
FH
FHOD3
FLI1
FLI1///EWSR1
FLI1
EWSR1
FOXC2
GALNT14
GATM
GINS2
GINS4
GLUL
GM2A
GNAZ
GNPAT
GOLGA3
GOT2
GP5
GPATCH2
GPR176
GUCY2C
H3F3AP4///H3F3A
H3F3AP4
H3F3A
HDGF
HEATR1
HIP1R
HIRIP3
HMGB1
HMMR
ID4
IFT81
IGHM
IGHV5-78
IGLL1
IGSF3
IKBKE
IKZF2
IKZF3
IL12RB2
IL7R
INSIG1
IPO5
IPP
IQSEC1
IRF4
ITGA8
ITIH3
ITPKB
JMJD4
KANK1
KCNA3
KCNJ12
KCNMB3
KDM4C
KIAA0226
KIAA0247
KIAA0922
KIF15
KIF3A
KLHL12
KLHL23
LAMA5
LARP6
LOC100290070///KCNJ18///KCNJ12
LOC100290070
KCNJ18
KCNJ12
LRMP
LRP4
LRRC15
LSM7
LTBP2
MAD1L1
MAGED1
MAP1A
MAP1B
MAP3K1
MED20
MERTK
MGAT5
MIA3
MMD
MPC2
MRPL9
MRPS14
MSH3
MTCH2
MTCL1
MYBPH
MYCBP
MYL4
NCAPD3
NCBP1
NCBP2
NDC1
NDUFA10
NDUFA4
NDUFS1
NEK2
NEK4
NELL2
NFKB1
NID2
NIPA2
NLGN1
NLK
NME7
NNT
NOL11
NOTCH2
NSG1
NSL1
NSUN5
NUP133
NUP88
NUP93
NUSAP1
NVL
NXN
NYNRIN
ODC1
OGFOD1
OIP5
ORC1
P4HA2
PARP1
PAWR
PAX5
PAXIP1
PBK
PBX1
PCBD1
PDE6D
PIEZO2
PIGZ
PITPNA
PITPNC1
PLEKHA2
PLEKHF2
PLGLA///PLGLB1///PLGLB2
PLGLA
PLGLB1
PLGLB2
PLGLB1///PLGLB2
PLXNB1
PNP
POGK
POLE3
POLM
POP4
PPA1
PPFIA4
PPFIBP1
PPIH
PPM1E
PPP1CC
PPP2R1B
PRDX2
PRDX6
PRKCZ
PRKRA
PRR5
PRR7
PSAT1
PSEN2
PSMD6
PTBP2
PTPN2
PTTG1
PTTG3P
QRSL1
R3HDM1
RABIF
RAG2
RASAL1
RASIP1
RFC5
RFK
RFWD3
RHOB
RHOBTB1
RHOQ
RIMS3
RLN2
RNF41
RNPEP
ROGDI
ROR1
RORB
RPA3
RPL39L
RPP30
SAMD4A
SARDH
SCCPDH
SDHC
SELT
SEMA4C
SEMA6D
SERINC4///ELL3
SERINC4
ELL3
SETX
SFT2D2
SGSM3
SH3BP4
SIRT2
SLAMF1
SLC15A2
SLC25A46
SLC27A2
SMYD2
SMYD3
SNRNP40
SNRPB2
SNRPE
SNRPF
SNTA1
SORBS1
SPA17
SPAG6
SRGAP2
SRP9
SRSF8
SS18L2
STAU2
STX2
SYNJ2
SYNPO
SYT1
TACC2
TBC1D4
TBCE
TENM4
TFAP2C
TFB2M
TGFBR2
THBS4
TIMM17A
TIPIN
TIPRL
TMCO1
TMEM121
TMEM183B///TMEM183A
TMEM183B
TMEM183A
TMEM189-UBE2V1///TMEM189///UBE2V1///RNPEP
TMEM189-UBE2V1
TMEM189
UBE2V1
RNPEP
TP53BP1
TPP2
TPR
TRAPPC8
TRIB2
TRIL
TRIM16
TSSC1
TST
TTC1
TTC13
TTC26
TTF1
UAP1
UBXN2B
UCHL5
UGT2B15
UGT8
USP39
VANGL1
VDAC1
VPS13A
VRK2
WAPAL
WASF1
WDR61
WDR70
WDR77
WNT16
YPEL1
YWHAQ
ZAP70
ZBTB18
ZFP64
ZMAT3
ZMAT5
ZNF385D
ZWILCH
