# Supplementary material for: The Expression Pattern of the Pre-B Cell Receptor Components Correlates with Cellular Stage and Clinical Outcome in Acute Lymphoblastic Leukemia
Source: PLoS One. 2016 Sep 9;11(9):e0162638. doi: 10.1371/journal.pone.0162638 (PMC5017602; doi:10.1371/journal.pone.0162638)
Supplement: S3 File — (XLSX) [file pone.0162638.s009.xlsx]

## Sheet: GSE12995
ABCA13
ABCB1
ABCC4
ACCS
ACP6
ACPP
ACVR1B
ADAM28
ADHFE1
ALDH1B1
ALDH2
ALDH3A2
ALS2
AMPD3
ANGPT1
ANKRD27
ANPEP
ANXA1
ARHGAP10
ARHGEF11
ARRB1
ATP8B4
ATP9A
ATXN1
AZU1
B4GALT5
BAALC
BACE1
BACE2
BEND6
BIN2
BST1
C10orf11
C10orf54
C1orf186
C9orf43
CABLES1
CACNB4
CAD
CALR
CAMKK2
CAPN2
CCDC102B
CCDC125
CCDC144CP///CCDC144B///CCDC144A
CCDC144CP
CCDC144B
CCDC144A
CCDC169
CCL23
CCR2
CCSER1
CD244
CD300A
CD3EAP
CD44
CDC42BPA
CDC42EP3
CDCP1
CDRT4
CEBPE
CFH
CFHR1
CHN2
CHRFAM7A///CHRNA7
CHRFAM7A
CHRNA7
CHRM3
CLC
CLEC11A
CLEC12A
CLEC5A
CLNK
CNKSR3
COL24A1
COL4A5
CPA3
CPED1
CPVL
CRHBP
CRYGD
CSF1R
CSF2RA
CSF2RB
CSF3R
CTDSPL
CTSD
CTSG
CTSW
CXCL8
CYFIP1
CYP7B1
CYTL1
CYYR1
DAB2
DACH1
DAPK1
DEPTOR
DLK1
DNAH14
DNAJA4
DNPH1
DOCK1
DOCK5
DPP4
DST
DYX1C1
DZIP1///CLDN10
DZIP1
CLDN10
ECRP
ELANE
EMR2
ENTPD7
EPB41L3
EPX
ERN1
ETV6
F2R
FAH
FAM101B
FAM105A
FAM117A
FAM129A
FAM198B
FAM46A///FAM46A
FAM46A
FBLN1
FBN1
FBN2
FCER1G
FCGR1C///FCGR1B///FCGR1A
FCGR1C
FCGR1B
FCGR1A
FKBP11
FNDC3B
FOSL2
FREM1
FRMD6
FRY
FSCN1
FYB
GALNT11
GATA2
GBP2
GLRB
GMDS
GMPR
GNA15
GOLGA8O///GOLGA8I///GOLGA8O///GOLGA8N
GOLGA8O
GOLGA8I
GOLGA8N
GOLGA8O///GOLGA8O///GOLGA8N
GOLGA8O///GOLGA8T///GOLGA8I
GOLGA8T
GOLGA8O///GOLGA8T///GOLGA8J///GOLGA8I///GOLGA8O///GOLGA8N
GOLGA8T///GOLGA8J///GOLGA8I
GOLGA8O
GOLGA8T
GOLGA8J
GOLGA8I
GOLGA8O
GOLGA8N
GOLM1
GPR126
GPR141
GRAMD3
GRAP2
GRB10
GSTM3
GYG2
HAVCR2
HDC
HEMGN
HGF
HK2
HLF
HMGA2
HNMT
HNRNPLL
HOXA5
HOXA7
HOXA9
HOXB2
HPGDS
HSPA4L
HYMAI///PLAGL1
HYMAI
PLAGL1
HYOU1
ICA1
IGSF10///MED12L
IGSF10
MED12L
IL1RL1
IL5RA
IL6R
ISYNA1
ITGA9
ITGAL
KAT2A
KCNAB2
KCNE1L
KCNE3
KDELC1
KIAA0930
KIAA1598
KIT
KPTN
LAPTM4B
LDLRAD3
LIMA1
LIN28B
LINC01140
LMO2
LOC100129572///ARHGAP10
LOC100129572
ARHGAP10
LOC100130264
LRP8
LRRC6
LY75-CD302///CD302///CD302
LY75-CD302
CD302
MACC1
MAGED2
MAP1A
MAP7
MAPKAPK3
2016-03-01
MARVELD1
MAST4
MECOM
MED12L
MEG3
MEIS1
MERTK
METAP1D
MGST1
MIR21
MIR4435-1HG///LINC00152
MIR4435-1HG
LINC00152
MIR675///H19
MIR675
H19
MLC1
MLKL
MLLT3
MPDZ
MPL
MPO
MPV17L
MS4A3
MSRB3
MTHFD1L
MTSS1L
MTURN
MUM1
MVB12B
MYCN
NAAA
NAGA
NAP1L3
NAT6///HYAL3
NAT6
HYAL3
NDRG1
NFE2
NGFRAP1
NKG7
NLN
NLRP3
NME4
NME8
NOG
NPR3
NRROS
P2RX7
P4HB
P4HB///P4HB
P4HB
PAM
PAPSS2
PAQR7
PARVB
PBX1
PCED1A
PDGFC
PES1
PEX5
PFAS
PFKM
PGPEP1
PHACTR2
PHKA1
PIEZO1
PLA2G4A
PLCB2
PLD1
PLEK
PLOD1
PLOD3
PLS3
PLTP
PLXDC2
POLR3D
POLR3G
PRAM1
PREX2
PRG2
PRKAG2
PROM1
PRSS57
PRTG
PRTN3
PSTPIP2
PTGES3L-AARSD1///PTGES3L
PTGES3L-AARSD1
PTGES3L
PTPRM
PTTG1IP
PTX3
PYGL
RAB27B
RAB31
RAB32
RAB44
RANBP17
RBFOX2
RBPMS
RGS10
RGS18
RHOU
RILPL2
RNASE2
RNASE3
RNF130
RNF217
RNF220
RNF24
RUNX1///RUNX1
RUNX1
RUNX2
S100B
S100Z
SCARNA17
SCN9A
SDF2L1
SEC24D
SELL
SELPLG
SEMA3C
SEMA4C
SERPINB1
SERPINB10
SERPINB6
SERPING1
SERPINH1
SFXN3
SLC18A2
SLC22A15
SLC22A4
SLC24A3
SLC29A3
SLC35C2
SLC38A5
SLC39A3
SLC40A1
SLC43A1
SLC9A3R1
SMARCA1
SNCA
SNORA71A
SNORA9///SNHG15
SNORA9
SNHG15
SNORD113-3
SNORD114-2
SNORD114-3
SPARC
SPECC1
SPINK2
SPIRE1
SPNS3
SPOCK3
SPRED2
SRGN
ST18
ST3GAL4
ST8SIA6
STAR
STAT5A
STOM
STON2
SVIL
SYTL4
TARP
TBC1D12
TBXAS1
TCEAL4///TCEAL4
TCEAL4
TCTEX1D1
TEC
TESC
TFEC
TGFBI
TIE1
TIMP1
TIMP3
TLR2
TMED9
TMEM164
TMEM173
TMEM181
TNFSF13B
TNIK
TNRC18
TOP1MT
TPM1
TRIM14
TRIM16L///TRIM16
TRIM16L
TRIM16
TTC7B
TTLL12
TXK
TXNRD3NB///TXNRD3
TXNRD3NB
TXNRD3
UGGT2
ULK4P2///GOLGA8T///GOLGA8I///ULK4P1///ULK4P3
ULK4P2///GOLGA8T///GOLGA8J///GOLGA8I///ULK4P1///ULK4P3
ULK4P2
GOLGA8T
GOLGA8J
GOLGA8I
ULK4P1
ULK4P3
VWDE
WDR27
WWC2
ZBTB16
ZDHHC9
ZFP36L2
ZNF160///TYROBP
ZNF160
TYROBP
ZNF334
ZNF462
ZNF521
ZNF662

## Sheet: Blood2003
ABCA9
ABCG2
ABHD17B
ACBD7
ACSL1
ADA
AGO2
AIM1
AK1
AK5
AKAP12
AKIP1
ALDH5A1
AMBRA1
AMOT
AP3M2
AP3S1
APOL3
APOL6
APPL1
ARHGAP5
ARL9
ARPC5L
ARRB2
ASAP1
ATL3
ATP1A3
ATP1B3
ATP2B4
ATP5G3
ATP8B2
AUNIP
AUTS2
B3GALTL
BANK1
BCAT1
BCL11A
BCL6
BLOC1S1
BMI1
BOLA3
BZW2
C10orf10
C18orf49///ZCCHC2
C18orf49
ZCCHC2
C1orf54
C4orf32
C5orf56
C6orf120
ECI2
PHF10
C6orf201
C6orf120///PHF10
C6orf201///ECI2
CACYBP
CALML4
CCDC176///ALDH6A1
CCDC176
ALDH6A1
CCT3
CCT5
CCT6A
CD109
CD248
CD27
CD34
CD96
CD99///CD99
CD99
CDK6
CDS2
CENPW
CHD1
CISD1
CKMT2
CLEC14A
CLEC2B
CMTM1///CKLF///CMTM1///CKLF
CKLF
CMTM1
CMTM2
CNTLN
COBL
COPS6
CSGALNACT1
CSRNP1
CTGF
CTTNBP2NL
DAGLB
DCAF16
DEFB131
DGKH
DIS3L
DNTT
DOK4
DPYSL2
DSEL
DUSP26
DYRK3
EDEM1
EIF2AK4
ELAVL1
ELK3
ENG
ERCC6L
ERG
ERGIC1
ERI3///ERI3
ERI3
ESD
ETS2
F13A1
FADS2
FAM110A
FAM122A
FAM134B
FAM169A
FAM213A
FAM26F
FBXW7
FGD6
FHIT
FHL1
FJX1
FKBP1A
FKBP3
GAB1
GAB2
GABPB1
GADD45A
GALNT2
GARS
GBP4
GFOD1
GIMAP2
GIMAP4
GIMAP7
GLRX
GMFG
GNB4
GNG11
GNPNAT1
GOT1
GPAM
GPM6B
GPR125
GPR176
GUCY1A3
GUK1
H2AFY
HERC6
HHAT
HHIP
HIST1H1A
HIST1H2BB
HIST1H2BE
HIST1H3E
HIST1H4F
HMGB1
HN1
HPS4
HS2ST1
HS3ST3B1
HSP90AA1
HSP90AA4P
HSP90AA6P
ID3
IFIT2
IFIT3
IFITM3
IGF1R
IGF2BP3
IGLL1
IGLL3P///GUSBP11///IGLL1
IGLL3P
GUSBP11
IL15
IL5
INO80
INTS3
IQCJ-SCHIP1///SCHIP1
IQCJ-SCHIP1
SCHIP1
ITGA5
ITPR1
JADE2///JADE2
JADE2
JADE3
JUP
KDELR2
KIAA1328
KIF16B
KIF20A///CDC23
CDC23
KIF20A
KLF10
KU-MEL-3
LAT2
LCK
LCN6
LEF1
LILRA2
LINC00341
LINC00544
LINC00670
LIPT1
LOC100132731///KIAA1257
LOC100996333///GPR125
LOC100132731
GPR125
KIAA1257
LOC100996333
LPCAT3
LRIG1
LRP12
LRRC14B
LRRC42
LRRC70
LST1
LTA
LTB
MAGED1
MAGED4///MAGED4B
MAGED4
MAGED4B
MAML2
MAP4K3
MAP4K4
MAPKAPK2
MBNL3
MBOAT2
MDM2
MED19
MEF2C
MFSD6
MGAT4A
MLLT11
MND1
MOCS3
MOV10
MPP1
MRPL14
MTF2
MYLK
MYO5C
NAB1
NAE1
NAP1L4
NCOA7
NDUFA3
NEDD4
NELFE
NEXN
NID2
NIPSNAP3A
NIPSNAP3B
NKIRAS1
NPCDR1
NPY
NRM
NSAP11
NTNG1
NUDT11
NUP153
OPALIN
OR2B2
OR5E1P
PA2G4
PAG1
PARD3
PDE9A
PECAM1
PHLDB2
PIM3
PKD2
PKI55
PKIG
PKN2
PLEKHA5
PLK2
PLSCR1
PM20D2
POLH
POLR2I///TBCB
POLR2I
TBCB
PPFIBP1
PPME1
PRKCH
PRKCI
PRR5L
PSD3
PSMA6
PSME2
PTCRA///SMARCD2
PTCRA
SMARCD2
PTGDR
PTK2
PTP4A3
PTPRD
PXDN
RAC1
RAG2
RAG2///RAG1
RAG1
RAPGEF2
RARRES3
RASAL2
RBMS3
RECK
REEP3
REPS1
RFC2
SPATA9
RFESD
RFESD///SPATA9
RFTN1///RFTN1
RFTN1
RGS9
RIMKLB
RIPK1
RNF152
RNF19B
RNPC3///AMY2B
RNPC3
AMY2B
RPP40
RRAGD
RSAD2
RTN3
SATB1
SCARNA23
SCCPDH
SCMH1
SCML2
SEC63
SEMA6A
2016-09-09
SERINC5///SERINC5
SERINC5
SERPINI1
SH2D4B
SH3RF1
SHMT1
SKA1
SLC16A1
SLC22A16
SLC27A3
SLC2A5
SLC35E3
SLC44A1
SLC8A1
SLC9A9
SLIT2
SMCO4
SMIM3
SMS
SNRPC
SOCS2
SOCS6
SORBS3
SPANXA2///SPANXB1///SPANXC///SPANXA1
SPANXA2
SPANXB1
SPANXC
SPANXA1
SRSF1
SSH2
ST3GAL1
STK32B
STX17
SUPT3H
SYNCRIP
SYNJ2BP
SYT11
TAPBPL///VAMP1
TAPBPL
VAMP1
TARP
TARP///TARP///TRGV7///TRGV5///TRGV3///TRGC2
TRGV7
TRGV5
TRGV3
TRGC2
TARP///TRGV7///TRGV5///TRGV3///TRGC2
TBC1D22B
TBC1D4
TCF7L2
TCP1
TIAM2
TKT
TLE4
TM9SF3
TMEM106C
TMEM194B
TMEM2
TMEM217
TMEM63B
TMOD2
TNF
TOE1
TOP2B
TOR1AIP2
TPGS2
TRAF3IP2
TRAT1
TRIP13
TSPAN14
TSPAN5
TSPAN7
TSSC1
TTC9C
TUBA4A
UBA7
UGT3A2
UHRF1
USP14
USP41///USP18
USP41
USP18
VAMP5
VAV3
VCL
VEZT
VPREB1
VPS26B
VSIG10
WDFY3
WDR78
XBP1
XRCC6
YARS
ZAK
ZCCHC14
ZMIZ1
ZMYM1
ZNF124
ZNF257
ZNF423
ZNF492
ZNF507
ZNF70
ZNF726
ZNF99
ZSCAN2

## Sheet: GSE26281
AASS
ABHD15
ADAM23
AES
AFF3
AKR1B1
ALKBH6
ANP32E
AOX1
APBB1IP
APBB2
APCDD1
APOBEC3A_B///APOBEC3B
APOBEC3A_B
APOBEC3B
APOLD1
ARL3
AS3MT
ASF1B
ASPM
ASXL1
ATXN7L1
AURKA
AURKB
B3GAT2///SMAP1
B3GAT2
SMAP1
BACH2
BAK1
BCL2L1
BCL2L11
BCL7A
BCOR
BEST3
BIK
BIRC5
BLOC1S6
BTK
BUB1
BUB3
C12orf57///C12orf57
C12orf57
C20orf196
C3orf52
C3orf67
C5orf34
CAMK2D
CAMK4
CAPSL
CARHSP1
CASC4
CASC5
CASK
CCDC107///ARHGEF39
CCDC107
ARHGEF39
CCDC112
CCDC141
CCDC42B///DDX54
CCDC42B
DDX54
CCDC69
CCNB2
CCND3
CCNDBP1
CCNF
CCNG2
CD38
CD81
CDC20
CDC25B
CDC25C
CDCA3
CDCA8
CDKL1
CDKN2C
CDR2
CECR1
CECR2
CEMIP
CENPE
CEP104
CEP162
CEP55
CEP76
CEP97
CHP1
CIPC
COMMD4
COQ10A
CPM
CRIP1
CTNNBL1
CYTH3
DAAM1
DACT1
DBI
DCAF12
DCLRE1C
DEPDC1B
DEPDC7
DHFRL1///DHFR
DHFRL1
DHFR
DLGAP5
DOCK4
DONSON
DZIP3
E2F2
E2F7
E2F8
EAF2
ECT2
EIF4A3
EPB41
ERI2///ACSM3
ERI2
ACSM3
ERVK3-1
ESCO2
ESPL1
FAIM
FAM111B
FAM3B
FAM72A///FAM72D
FAM72A///FAM72D///FAM72B
FAM72A
FAM72D
FAM72B
FANCC
FBXO25
FBXO43
FBXO5
FGD4
FLCN
GAB3
GABPB2
GAS2L3
GAS7
GCSAM
GEMIN7
GJC1
GLDC
GLO1
GLRX5
GLUL
GNAZ
GORASP1
GPR34
GPR82
GRAMD1C
GSG2
GTSE1
H1FX
H2AFJ
HAUS8
HERC5
HEY2
HIST1H1B
HIST1H1C
HIST1H1D
HIST1H1E
HIST1H2AH
HIST1H2AI
HIST1H2AK
HIST1H2AL
HIST1H2BH
HIST1H2BI
HIST1H2BJ
HIST1H2BK///H2BFS///HIST1H2BE
HIST1H2BK
H2BFS
HIST1H2BE
HIST1H2BL
HIST1H2BM
HIST1H2BN///HIST1H2AK
HIST1H2BN
HIST1H2AK
HIST1H2BO
HIST1H3B
HIST1H3C
HIST1H3D///HIST1H2AD
HIST1H3D
HIST1H2AD
HIST1H3F
HIST1H3G
HIST1H3H///HIST1H2AI
HIST1H3H
HIST1H2AI
HIST1H3H
HIST1H2AI
HIST1H3I
HIST1H3J
HIST1H4A
HIST1H4B
HIST1H4D
HIST1H4J///HIST1H4K
HIST1H4J
HIST1H4K
HIST1H4L
HIST2H2AB
HIST2H2BC///HIST2H2BE
HIST2H2BC
HIST2H2BE
HIST2H2BF///HIST2H2BA
HIST2H2BF
HIST2H2BA
HIST2H3D///HIST2H3A///HIST2H3C
HIST2H3D
HIST2H3A
HIST2H3C
HIST2H4A
HIST2H4B
HIST4H4
HMGB3
HMMR
IFNAR1
IFT22
IFT81
IGF2R
IGHG1///IGHA1///C14orf99
IGHG1
IGHA1
C14orf99
IGHG1///IGHV3-48
IGHG1
IGHV3-48
IGHV3-48
IGK///IGKV3-20///IGHV3-23
IGLJ3///IGHG1///IGHV3-48
IGK
IGLJ3
IGKV3-20
IGHG1
IGHV3-23
IGHV3-48
IKZF2
IL10RB
INS-IGF2///IGF2
INS-IGF2
IGF2
IRF4
ISCA2
KCNA3
KCNJ2
KHDRBS3
KIAA0226L
KIAA0922
KIF11
KIF14
KIF15
KIF24
KLHL2
KLHL6
KLRC3
KLRC4
KLRK1///KLRC4
KLRC4
KREMEN1
LAMP5
LDLRAD4
LGALS9C///LGALS9B///LGALS9
LGALS9C
LGALS9B
LGALS9
LGR5
LIMD1-AS1
LINC00266-1
LINC00472
LMO7
LNX1
LOC100130503
LOC100134822
FIP1L1
ARPP21
LINC00266-1
LNX1///FIP1L1
LOC100130503///ARPP21
LOC100134822///LINC00266-1
LOC100506990
LOC101927770
LOC400927///CSNK1E
LOC441179///C6orf123
LOC728323///FBXO25
LOC400927
LOC441179
LOC728323
CSNK1E
C6orf123
FBXO25
LPHN2
LRP2BP
LRTOMT
LYRM1
MAD2L2
MAP2
MAPRE1
2016-03-03
MED20
MELK
MFGE8
MICB
MID1IP1
MKI67
MNS1
MPZL1
MRO
MRPS6///SLC5A3
MSMP///RGP1
MRPS6
MSMP
SLC5A3
RGP1
MYBL1
MYO3A
NARF
NEIL3
NEK2
NETO2
NRF1
NSMCE1
NSUN7
NT5E
NTAN1///PDXDC1
NTAN1
PDXDC1
NTS
NUDT7
NUSAP1
OGFRL1
OIP5
P4HA2
PBK
PCGF5
PDLIM1
PELI2
PIK3R3
PIM1
PIM2
PITPNM2
PLCL2
PLEKHG1
PLK1
PPM1K
PPP1CA
PPP2R5C
PRDX2
PRKCE
PROSER1
PRR11
PSAT1
PTPRE
RAB3IP
RACGAP1
RACGAP1P///RACGAP1
RACGAP1P
RACGAP1
RAD21
RAD51
RAG2
RAPGEF5
REXO2
RHOBTB1
RHOH
RIMS3
RITA1
RMND5B
RNF144B
RNF34
RNFT2
ROR1
RPL39L
RRM2
RTKN2
RTN4IP1
SDHA
SERINC2
SERPINF1
SFMBT1
SGCB
SGOL1
SHCBP1
SIAE///SPA17
SIAE
SPA17
SIMC1
SLAMF6
SLC16A9
SLC25A35///RANGRF
SLC25A35
RANGRF
SLC25A4
SLC7A3
SLC8B1
SLC9A7
SLC9C1
SMARCB1
SMYD2
SNX24
SORT1
SPAG5///SPAG5
SPAG5
SPP1
SPTBN1
SRA1
ST3GAL5
STIL
STK24
STK33
STMN1
STS
STX5
SYK
SYNE2
TAF8
TAX1BP3
TBC1D14
TCF3
TCL1A
TCL6
TDRKH
TERC
TERF1
TFDP2
TIFA
TMEM116
TMEM263
TMEM69///IPP
TMEM69
IPP
TMEM99
TMPO
TMSB15A
TMX4
TNFRSF17
TOP1
TOP2A
TPST1///TPST1
TPST1
TPX2
TROAP
TST
TTC21A
TTC39C
TTC7A
TTLL7
TUBA1A
TUBB8///TUBB7P
TUBB8
TUBB7P
TULP4
UBB
UBE2C
UBE2E4P///UBE2E3
UBE2E4P
UBE2E3
UBE2F
UBE2T
UCHL1
USP49
UXS1
VAT1L
VDAC1
VDR
VLDLR
VLDLR-AS1///VLDLR
VLDLR-AS1
VLDLR
VNN2
WASF1
WBP2
WDR35
WDTC1
WIBG
XRCC6BP1
YBX3
YPEL3
ZBTB18
ZBTB33
ZDHHC23
ZIK1
ZNF101
ZNF441
ZNF611
ZNF701
ZNF826P
ZSCAN9
ZSWIM1

## Sheet: GSE17703
ABCA11P
ABCC5
ABCG2
ABHD10
ABHD3
ABHD6
ACKR3
ACSL3
AGFG1
AGPAT2
AIF1
AJAP1
AK1
ALDOC
ALOX5
ANGPTL2
ANKLE2
ANO1
APOBEC3A
ARFIP1
ARHGAP29
ARHGAP32
ARHGAP33
ARHGEF12
ARHGEF18
ARHGEF4
ARID1A
ARID3A
ASAP2
ATP8B2
B4GALT6
BAG3
BIRC7
BMP2
BTN2A2
C12orf49
C14orf132
CAB39
CALM3
CALU
CBFA2T3
CBX5
CCDC93
CCNJL
CD200
CD27
CD40
CD79A
CDH4
CDK2
CERS4
CHCHD7
CHD1
CHD9
CHL1
CLASP1
CLIC5
CLMN
CLSTN1
COMMD4
CRIM1
CRK
CRKL
CRMP1
CTCF
CUL7
CUL9
CUX1
CYB5R2
DAB1
DBN1
DCHS1
DCP2
DDAH2
DIDO1
DIP2C
DLGAP2
DNMBP
DNMT3A
DPEP1
DPF3
DPYSL2
DRAM1
DSC2
DSC3
DSG2
DYRK3
E2F6
EDEM1
EFNB2
EGFL7
EHD2
EIF2AK3
ELK3
ENPP4
ENTPD4
EPN2
EVA1B
FAAH
FAM60A
FAM65A
FARP1
FBN2
FCGRT
FCHSD2
FERMT2
FGD1
FGD6
FHIT
FKBP1A
FKBP4
FLRT3
FNBP1L
FOXK2
FOXO1
FUCA1
FYB
FZD2
GAB1
GABBR1
GABPB1
GAK
GAL3ST4
GATA2
GBA3
GFI1
GNG11
GNG7
GNPDA1
GNPTAB
GOLGA8B
GOLGA8B///GOLGA8A
GOLGA8B
GOLGA8A
GPR125
GPR17
GREB1
GRINA
GRK5
GTF2IRD1
GTF3C1
GUCY1B3
GYS1
H1F0
HAP1
HAUS5
HGSNAT
HHEX
HIST1H2AG
HIST1H2BD
HIST1H2BG
HIST1H2BH
HLA-DMA
HLA-DOB
HLA-DRA
HMG20A
HMGB3
HNRNPA0
HSPA4
HYI
IDI1
IL6ST
ILF3
INSR
INTS3
IPW
IRAK3
IRS2
ISG20
ITPR1
ITPR3
JUP
KAT6A
KBTBD2
KCNK3
KCNN1
KDM4B
KHDRBS3
KIAA0226L
KIF26B
KIT
KLHDC10
KNTC1
LBH
LGALS7B///LGALS7
LGALS7B
LGALS7
LGALS8
LILRA2
LIMK2
LIMS2
LINC00597
LPHN3
LRP8
LYPLA2
MAGED4///MAGED4B
MAGED4
MAGED4B
MAPK13
MAPK14
MAPK6
MAPK7
MAPK8IP3
2016-03-06
MCM2
MDK
MDM2
MEF2C
MEST
MKL2
MLLT11
MLXIP
MMP15
MORC2
MSRB2
MTF2
MYH10
MYO10
MYO5C
NAA16
NAA40
NARFL
NASP
NEIL1
NMT2
NOTCH1
NOVA1
NPR1
NR3C2
NRN1
NRTN
NUDT11
NUP205
OCA2
OR2B6
OSBPL2
OXSR1
PAPD7
PARD3
PATZ1
PBXIP1
PCGF3
PCLO
PDK1
PDLIM7
PFKFB2
PHACTR4
PID1
PIK3C3
PIK3IP1
PIM1
PIP5K1C
PLA2G15
PLAG1
PLAGL2
PLCG1
PLCL2
PLCXD1
PLSCR3
POLE
POMT1
POU2AF1
PPM1B
PPP2R3B
PRKCB
PRKX
PRODH2
PRSS2
PRSS3
PRSS3///PRSS2///PRSS1
PRSS3
PRSS2
PRSS1
PRSS3P2///PRSS1
PRSS3P2
PRSS1
PSD3
PTK2
PTOV1
PTP4A3
PTPRB
PTPRF
PTPRK
PUM1
PVRIG
PXN
PYHIN1
RAB1A
RAF1
RAG1
RASA4
RASA4B///RASA4CP///RASA4
RASA4B
RASA4CP
RASA4
RASA4CP///RASA4
RASA4CP
RASA4
RBM26
RBM5
RBMS1
RCN3
RDX
REL
RERGL
RIMBP2
RNF31
RNF38
RPS6KA2
RSRC2
RYR3
SCARB1
SCMH1
SCN3A
SDC1
SDC2
SEMA3F
SEMA6A
SEPHS1
SERINC5
SETD4
SFXN1
SH3GLB2
SIDT1
SIN3B
SIPA1L1
SIPA1L3
SLC12A2
SLC17A7
SLC27A3
SLC35E3
SLC5A6
SLC8B1
SMAD1
SMARCA4
SMTN
SNRK
SNRNP27
SNRPN
SNURF///SNRPN
SNURF
SNRPN
SOX11
SPANXA2///SPANXB1///SPANXC///SPANXA1
SPANXA2
SPANXB1
SPANXC
SPANXA1
SPANXB1
SPANXC
SPIN1
SPON1
SPTAN1
SRBD1
SRSF10
SSX2B///SSX2
SSX2B
SSX2
STAG3
STAT5B
STK32B
STMN1
SYNRG
TAGLN3
TARS2
TBC1D8B
TBC1D9
TCFL5
TCL6
TERF2
TFPI
TGFBRAP1
THEMIS2
TIA1
TLE3
TMCC1
TMEM120B
TMEM243
TMF1
TNFRSF21
TNK1
TNKS
TNS1
TNS3
TP53BP1
TRAF5
TRANK1
TRAT1
TRIB1
TRIM24
TRIM27
TRIP6
TRO
TRPM4
TSPAN9
TSPYL5
TUBGCP4
TUSC3
TXNRD1
UBE2E3
UTRN
VAV1
VGLL4
VPREB3
VPS13C
WASF2
WBP1L
WDFY3
WDR37
WSB1
YEATS2
ZC3HAV1
ZCCHC14
ZCCHC8
ZDHHC3
ZMYM2
ZNF107
ZNF117
ZNF217
ZNF273
ZNF274
ZNF423
ZNF672
ZNF91
