# Supplementary material for: The Expression Pattern of the Pre-B Cell Receptor Components Correlates with Cellular Stage and Clinical Outcome in Acute Lymphoblastic Leukemia
Source: PLoS One. 2016 Sep 9;11(9):e0162638. doi: 10.1371/journal.pone.0162638 (PMC5017602; doi:10.1371/journal.pone.0162638)
Supplement: S4 File — (XLSX) [file pone.0162638.s010.xlsx]

## Sheet: GSE12995
ABL1
ABLIM1
ACTN4
ADAM15
ADCY3
ADM
AGFG2
AGPS
AHNAK
AHR
AKR1C3
AMBRA1
ANAPC10
ANXA11
ANXA4
AP3S1
APOL3
ARAP2
ARF3
ARF6
ARHGAP15
ARHGAP22
ARHGEF17
ARHGEF3
ARPC2
ARPC5L
ARRB1
ASB13
ATG3
ATP10A
ATP13A2
ATP2C1
ATP6V0E1
ATXN7
B2M
B3GNTL1
BAALC
BACE1
BMPR1B
BNIP2
C1orf54
C8G
CA6
CALM1
CAPN11
CAPZA2
CAPZB
CASP10
CASP8
CAST
CAV1
CCND2
CCR6
CD248
CD27
CD300A
CD69
CD74
CD97
CD99
CDC42EP3
CDK9
CDKL1
CDKN2C
CDS2
CELF2
CEP68
CFD
CFHR1///CFH
CFLAR
CHKA
CHST15
CHSY1
CISH
CKLF
CLEC2B
CLIC1
CLIP1
CLN6
CLPS
CLUAP1
CMAHP
CNN3
COL6A3
COLQ
CPVL
CRADD
CRIP2
CRYBG3
CTDSPL
CTNND1
CTSW
DCK
DCTN4
DDO
DDOST
DDX31
DEAF1
DEGS1
DENND3
DENND5A
DERL1
DFNA5
DKK1
DNTT
DOK4
DPYD
DSE
DUSP6
DUSP7
DYRK2
ECM1
EFNA1
EMC7
EMP1
ENG
ENOSF1
ENPP2
EPAS1
ERV3-2
ETFB
ETV5
F2R
FAF1
FAM124B
FAM129A
FAM168A
FAM65B
FBXW7
FGL2
FSCN1
FXYD5
FYN
FZD6
G3BP1
GAB1
GADD45A
GBP2
GHR
GIMAP4
GIMAP5
GIMAP6
GNAI1
GPA33
GPR56
GRAMD1C
GRB10
GSN
GSTT1
GYPC
H2AFY
HBS1L
HINT1
HIST1H2AK
HIVEP2
HLA-DQA1
HLA-DQB1
HPCAL1
HUWE1
ICAM3
IER5
IFITM1
IFITM2
IFITM3
IGFBP4
IGFBP7
IGJ
IL12A
IL2RA
IMPACT
INPP1
INPP4B
IQCJ-SCHIP1///SCHIP1
IREB2
IRF5
ITGA6
ITGAL
ITGAV
ITGB1
ITGB7
ITM2B
JADE2
JAK1
KAZALD1
KCNA5
KIF1B
KLF3-AS1
KLF6
KLF9
KLHL2
KLRF1
LAIR2
LCP2
LDLRAP1
LHX6
LIMD1
LIMS1
LIMS3
LINC00623
LMNA
LOC100133583///HLA-DQB1
LOX
LPAR6
LRRFIP1
LST1
LTBR
LUZP1
M6PR
MAFB
MAGT1
MAN1C1
MAP3K6
MAPKAPK3
MCF2L
MCTP1
MFAP3
MFSD6
MGST2
MINA
MMP28
MMRN1
MPP6
MT2A
MTSS1
MTUS2
MVP
MXRA7
MYL9
MYO1B
MYRIP
NAB1
NBN
NEAT1
NEDD4
NEK3
NFATC1
NFE2L2
NLGN4X
NOV
NPC1
NPDC1
NRP1
NRXN3
NT5E
NTHL1
OBFC1
OLFML2A
OR7A5
OSBPL10
OSBPL1A
OSBPL3
P2RY14
PACSIN2
PALM
PARP3
PASK
PAWR
PCDH12
PCNXL2
PDCL3P4///PDCL3
PDE9A
PDK4
PDXK
PEMT
PGAP1
PHKB
PIGV
PLXNB2
PNMT
POLH
PON2
PPIB
PPIP5K2
PPM1F
PPP1R2
PPP2CB
PPP6R1
PRKCA
PRKCH
PRKD2
PRKD3
PROSC
PRR5L
PRX
PSD4
PSTPIP2
PTPLA
PTPN14
PTPN18
PTPRD
RAB11A
RAB13
RAB29
RAI14
RALB
RAP1GAP2
RBM47
RCBTB2
RCN2
REL
RHOA
RIN3
RIPK2
RNASET2
ROBO4
RPL23AP32
RPLP1
RPS6KA2
RRAS
RTN4
RUFY2
RUNX3
S100A13
S100A4
SEC14L1
SEC24A
SEMA6A
SERPINB1
SERPINB6
SERPINB9
SH2B3
SH3BP5
SLC16A2
SLC2A5
SLC35A3
SLC35D2
SLC38A1
SLC44A1
SLC48A1
SLC5A3
SLC9A3R1
SLC9A3R2
SLCO2B1
SMAD3
SMYD2
SNAP29
SNX10
SNX2
SNX7
SOCS2
SPARC
SPATA31C2
SPATS2L
SPHK1
SPOCK2
SPRED2
ST18
STARD7
STK10
STK17B
STX12
STX3
SUMO4
SV2A
SV2B
SYNE2
TAB2
TARP
TARP///TRGC2
TBC1D15
TBKBP1
TBX21
TBXA2R
TBXAS1
TCF7L2
TCTA
TJP2
TM7SF3
TMBIM1
TMED7
TMEM134
TMEM156
TMEM204
TNFRSF17
TNFRSF1A
TNFRSF1B
TNIP1
TOX
TPT1
TRAM2
TREML2
TSPAN13
TSPAN15
TUBA4A
TXNDC15
TXNIP
UBE2L3
UPP1
UTP3
VANGL1
VAV3
VKORC1
WSB2
XBP1
XCL2///XCL1
YES1
YIPF5
ZBTB38
ZFHX3
ZFPM2
ZNF112

## Sheet: Blood2003
ABL1
ABLIM1
ACSL5
ACTN1
ACTN4
ACVR2A
ADCY3
AGFG2
AGPS
AHNAK
AHR
AKIP1
AMBRA1
ANP32A-IT1
ANXA11
ANXA4
APOL2
APOL3
ARAP2
ARF3
ARF6
ARHGAP12
ARHGAP22
ARHGEF17
ARPC5L
ARRB1
ASB13
ASCC1
ASCL2
ATM
ATP10A
ATP13A2
B3GNTL1
BAALC
BMP2K
BMPR1B
BSPRY
BST1
C16orf45
C1R
C1orf54
C8orf60
CA6
CABIN1
CALM1 /// CALM2 /// CALM3
CAMSAP2
CAPN11
CASP1
CASP10
CASP4
CASP8
CAST
CAV1
CCDC88C
CCND2
CCPG1
CD248
CD27
CD300A
CD34
CD97
CD99
CDC42EP3
CDK9
CDKN2C
CDS2
CEACAM6
CELF2
CEP68
CHN2
CHSY1
CISH
CKLF
CKLF /// CKLF-CMTM1
CLEC2B
CLUAP1
CMAHP
CNN3
COL6A3
COLQ
CPVL
CRADD
CRELD2
CSGALNACT1
CTDSPL
CTNNBIP1
CTNND1 /// TMX2-CTNND1
CXCR3
DAB2
DCK
DCTN4
DEAF1
DENND3
DENND5A
DFNA5
DGCR6 /// DGCR6L
DLC1
DPAGT1
DPYD
DUSP26
DUSP6
DUSP7
ECM1
EFNA1
ELOVL1
EMP1
ENG
ENOSF1
ENPP2
EPAS1
ERBB2
ETFB
ETV5
F2R
FAF1
FAM117A
FAM129A
FAM13A
FAM168A
FAM47E /// FAM47E-STBD1 /// STBD1
FAM65B
FAR2
FARP1 /// FARP1-IT1
FBXW7
FGL2
FHL1
FKSG2
FLJ13197
FSCN1
FXYD5
FXYD6
FYN
FZD6
GAB1
GADD45A
GAS6
GBP2
GCHFR
GGT5
GIMAP1-GIMAP5 /// GIMAP5
GIMAP4
GIMAP6
GLS
GNAI1
GPAA1
GPR56
GRAMD1C
GRB10
GSDMD
GSN
GSTO1
GTF3A
GYPC
H2AFY
HBS1L
HCFC1R1
HDAC7
HIVEP2
HPCAL1
HTRA2
ICAM3
IER5
IFI30 /// PIK3R2
IFITM1
IFITM1 /// IFITM2
IFITM3
IGFBP4
IGJ
IL15RA
IL2RA
INPP1
INPP4B
IQCJ-SCHIP1 /// SCHIP1
ITFG1
ITGA5
ITGA6
ITGB1
ITGB7
ITM2B
JAK1
KAZALD1
KCNA5
KCTD3
KDELR2
KLF10
KLF9
LAIR1
LAMA3
LAX1
LCP2
LDLRAP1
LIMD1
LIMS1
LINC00623 /// LOC728875
LMAN2
LOC100288570
LOC100996668 /// ZEB1
LOC100996752 /// LOC101060261 /// NUDT4
LOC100996752 /// LOC101060261 /// NUDT4 /// NUDT4P1
LPAR6
LPIN2
LPP
LRRC8D
LTBR
LUZP1
LXN
MAF
MAFB
MAN1A1
MAN1C1
MAP3K11
MAPKAPK3
MCF2L
MDFIC
MFAP3
MFSD12
MIR612 /// NEAT1
MMP28
MMRN1
MRC1
MS4A1
MT2A
MTSS1
MUC4
MVP
MXRA7
MYL9
MYO1B
MYO5C
NAB1
NCOA1
NEDD4
NLGN4X
NLRX1
NOV
NPC1
NPDC1
NRP1
NRXN3
NT5E
OBFC1
OLFML2A
OPTN
OSBPL10
OSBPL1A
OSBPL3
OTTHUMG00000003319 /// RP4-781L3.1
P2RY14
PACSIN2
PAK1
PALM
PASK
PCDH12
PCNXL2
PDE9A
PDK4
PDXK
PECAM1
PEMT
PGAP1
PHF15
PHTF1
PHTF2
PICALM
PIEZO1
PIGV
PLXND1
PON2
PPIB
PPIP5K2
PPM1F
PRKCA
PRKCH
PRKD2
PRKD3
PRR5L
PRX
PSAP
PSTPIP2
PTPLA
PTPN14
PTPN18
PTPRD
PVRIG
RAB11A
RAB11FIP5
RAB13
RAB15
RAB27A
RAB7L1
RAI14
RBM47
RCN2
RFTN1
RGP1
RGS10
RHOG
RIN3
RNASET2
RNF121
RNF44
ROBO3
RPL23AP32
RPLP1
RPS6KA2
RRAS
RUNX3
S100A13
S100A6
SAR1B
SAV1
SCN1B
SEC14L1
SECTM1
SEMA6A
SERHL /// SERHL2
SERPINB6
SERPINB9
SH2B3
SH3BP5
SIGIRR
SIPA1L3
SLC16A2
SLC20A1
SLC2A5
SLC35D2
SLC38A1
SLC43A3
SLC48A1
SLC5A3
SLC9A3R1
SLK
SMAD3
SMCO4
SNX5
SP140
SPARC
SPATS2L
SPCS2
SPHK1
SPOCK2
SPRED2
SRGN
SRRD
ST3GAL5
STAB1
STAM
STARD3
STARD7
STK10
STK17A
STX3
SV2A
SYNE2
TAB2
TAPBPL
TARP
TARP /// TRGC2
TBKBP1
TBX21
TBXA2R
TCIRG1
TEX2
TGFBI
THAP4
TJP2
TM7SF3
TMBIM1
TMC6
TMED9
TMEM134
TMEM156
TMEM204
TNFRSF14
TNFRSF17
TNFRSF1A
TNFRSF1B
TNFSF12 /// TNFSF12-TNFSF13
TNIP1
TOX
TPP1
TPST2
TPT1
TRAM2
TRMT12
TSPAN15
TSPAN7
TUBA4A
UPP1
USP15
UTP3
VANGL1
VAV3
VKORC1
WSB2
XBP1
YES1
ZFHX3
ZNF133
ZNF467

## Sheet: GSE26281
2016-03-07
ABCD3
ABL1
ABLIM1
ADAM15
ADM
AGFG2
AGPS
AHNAK
AHR
AKR1C3
AMBRA1
ANXA4
APOL3
APRT
ARAP2
ARHGAP15
ARHGAP22
ARHGEF17
ARHGEF3
ARPC2
ARRB1
ASB13
ASGR1
ASS1
ASXL2
ATG3
ATP10A
ATP13A2
ATP2C1
ATP5H
ATP6V0E1
ATXN7
B2M
BAALC
BACE1
BMPR1B
BTN3A3
C11orf73
C1orf56
C8G
CA6
CABIN1
CALHM2
CAPZA2
CAPZB
CASP1
CASP10
CASP4
CAV1
CCND2
CCR2
CCR6
CD164
CD244
CD248
CD27
CD300A
CD33
CD4
CD52
CD97
CD99
CDC42EP3
CDK9
CDKL1
CEACAM21
CELF2
CEP68
CFD
CFHR1///CFH
CISH
CKLF
CLEC4A
CLIC1
CLIC3
CLPS
CLTB
CNN3
COBRA1
COL6A3
COLQ
COMMD10
COX5B
CPVL
CR2
CRADD
CRELD2
CRIP2
CRYBG3
CSNK1A1
CST3
CTDSPL
CTNNA2
CTNND1
CTSW
DCK
DCTN4
DDO
DDOST
DDX31
DEAF1
DEGS1
DENND3
DENND5A
DMXL1
DNTT
DOK1
DOK4
DPYD
DUSP6
DUSP7
DYNC1LI1
ECM1
EEF1A1
EEF1A1P9///EEF1A1
EFNA1
EIF5A
ELOVL1
EMP1
ENG
ENOSF1
ENPP2
EPAS1
EPHA4
ERCC5
ETV5
FAM124B
FAM129A
FAM65B
FAR2
FGL2
FLJ13197
FSCN1
FYN
FZD6
G3BP1
GAB1
GADD45A
GBP2
GGT5
GHR
GIMAP4
GIMAP5
GIMAP6
GLIPR1
GLTPD1
GNAI1
GOLPH3
GPA33
GPAA1
GPR56
GPRC5C
GRK6
GRWD1
GSTO1
GTF3A
GYPC
H2AFY
HBS1L
HIST1H2AK
HIVEP2
HLA-DQA1
HLA-DQB1
HLA-DRA
HPCAL1
HSPB2
HUWE1
HYPK///SERF2
ICAM3
IDH3A
IFIH1
IFITM1
IFITM2
IFITM3
IGJ
IL18
IL2RA
IMPACT
INPP1
INPP4B
IQCJ-SCHIP1///SCHIP1
IREB2
ITGA6
ITGB1
JMJD4
KIF1B
KIFAP3
KLF8
LCP2
LDLRAP1
LGALS2
LHX6
LIMD1
LIMS1
LIMS3
LINC00623
LMAN2
LOC100288939
LOC100507328
LOC285359///PDCL3
LOC391020
LOX
LPAR6
LRRC8D
LST1
LTBR
M6PR
MAF
MAFB
MAN1C1
MAPK4
MAPKAPK3
MCF2L
MCTP1
MDFIC
MED16
METTL5
METTL7A
MFAP3
MINA
MMP28
MMRN1
MPP6
MRPL40
MS4A4A
MTSS1
MUC4
MVP
MYL9
MYO1B
MYRIP
NAB1
NBEAL2
NDOR1
NDUFB1
NEDD4
NEK3
NLGN4X
NOV
NPDC1
NRP1
NRXN3
NT5E
NTHL1
NUDT4P1///NUDT4
OBFC1
OLFML2A
OR7A5
OSBPL10
OSBPL1A
OSBPL3
P2RY14
PALM
PARK7
PAWR
PCNXL2
PEMT
PHF15
PHKB
PIGV
PLAC8
PON2
PPCS
PPIB
PPIP5K2
PPM1F
PPP1R7
PPP6R1
PRKCA
PRKCH
PRKD3
PROSC
PRR5L
PRX
PSD4
PSTPIP2
PTPLA
PTPN14
PTPN18
PTPRCAP
PTPRD
PYCARD
RAB11A
RAB13
RAB7L1
RALB
RASGRP3
RBM47
RHOA
RIN3
RNASET2
ROBO3
RPL13AP5///RPL13AP6///RPL13A
RPL18AP3///RPL18A
RPL23A
RPL26L1
RPL27
RPL27A
RPL31
RPL37A
RPL39
RPL41
RPL9
RPLP1
RPN1
RPS10
RPS14
RPS18
RPS2
RPS23
RPS27
RPS29
RRAS
RSBN1
RUNX3
S100A13
S100A4
S100A6
SDF2L1
SEC22B
SEC24A
SEMA6A
SERPINB6
SH3BP5
SLC2A5
SLC35D2
SLC38A1
SLC48A1
SLC9A3R1
SLC9A3R2
SLCO2B1
SMARCAL1
SMYD2
SNAP29
SNX2
SNX7
SOCS2
SPARC
SPATS2L
SPOCK2
SPRED2
SQRDL
ST18
STK10
STX12
STX3
SUMO4
SV2A
SV2B
SWAP70
TAB2
TADA3
TAPBPL
TARP
TARP///TRGC2
TBX21
TBXA2R
TBXAS1
TCTA
TGFB1
TMBIM1
TMEM156
TMEM204
TMSB4XP8///TMSB4X
TNFRSF14
TNFRSF17
TNFRSF1A
TNFRSF1B
TNFSF12
TNIP1
TOR4A
TOX
TPBG
TPT1
TRADD
TRAF2
TRAM2
TRAPPC2L
TRBC2
TSPAN13
TSPAN15
TUBA4A
UBE2L3
UCHL3
UPP1
UQCRQ
UTP11L
UTP3
VAMP5
VAV3
WDR43
WDR74
WSB2
XBP1
XCL2///XCL1
YIPF5
ZBTB20
ZFHX3
ZNF787

## Sheet: GSE17703
ABCB1
ABCC4
ABHD5
ABL1
ABLIM1
ACSL1
ACTN1
ACVR2A
ADCY3
ADCY6
AFTPH
AGPS
AHI1
AHNAK
AKR1C3
ALAS2
ANXA4
APOLD1
AQP9
ARAP2
ARG1
ARHGAP22
ARHGAP26
ARL4A
ARNTL2
ASAH1
ASB13
ATP10A
ATP2C1
ATP6V1A
ATRNL1
BAALC
BACE1
BCAP29
BCL6
BMP2K
BSPRY
C16orf45
C5AR1
C7orf25///PSMA2
CALHM2
CAMSAP2
CAPZA2
CASP10
CASP8
CAV1
CCL2
CCNE1
CCNE2
CCPG1
CD14
CD248
CD47
CD97
CD99
CDC42EP3
CDS2
CEACAM6
CEBPB
CEBPD
CFLAR
CFP
CHKA
CHN1
CHST3
CLEC11A
CLEC2B
CMAHP
COA1
COL11A1
COL4A2
COL6A3
COLQ
CPOX
CR1
CR2
CRIP2
CRISPLD2
CSGALNACT1
CTBS
CTDSPL
CTSS
CXCL8
CXCR1
CXCR2
CYBRD1
DCTN4
DDI2
DENND4A
DENND5A
DEPTOR
DKK1
DLC1
DPYD
ECM1
EHHADH
EMP1
ENG
ENO2
ENOSF1
ENPP2
EOGT
EPAS1
EPB42
EPS8
ERBB2
ERLIN1
ETFB
ETV5
F2R
F2RL1
FAM117A
FAM129A
FAM65B
FANCL
FCGR2C
FCGR3B
FCGR3B///FCGR3A
FERMT1
FGL2
FGR
FPGT
FPR1
FPR2
FSCN1
FZD6
G0S2
GAB1
GADD45A
GBP2
GCA
GFOD1
GIMAP4
GIMAP5
GIMAP6
GIPC2
GNAI1
GNG12
GNS
GPA33
GPR110
GYG1
GYPA
GYPC
HHLA2
HIVEP2
HMGN5
HOPX
HPCAL1
HPGDS
HPSE
HSPB1
ICA1
ICAM3
ID1
IFITM1
IFITM2
IFITM3
IGSF6
IKZF1
IL12A
IL1R1
IL1R2
IL2RA
INHBB
INPP1
INPP4B
ITGA5
ITGA6
ITGA9
ITGAV
ITGB1
ITM2B
JADE1
KCNJ15
KCNS3
KCTD3
KL
KLF3-AS1
KLF7
KRT23
KYNU
LAMA3
LCP2
LGR5
LHX6
LIMD1
LIMS1
LIMS3
LINC00623
LITAF
LOC257152
LOC730101
LOX
LPIN2
LRRC8D
LTBR
LUZP1
LXN
LYZ
MAFB
MAN1A1
MAN1C1
MANSC1
MAPKAPK3
MATN3
MBNL1
MCAM
MCF2L
MCTP1
MFSD6
MGAM
MGP
MINA
MINPP1
MIR21///VMP1
MMP28
MMRN1
MOCS2
MPP6
MS4A4A
MT1H
MT1HL1
MT1X
MT2A
MTO1
MTSS1
MTUS2
MUC4
MXD1
MXRA7
MYO3A
N4BP2L1
NAB1
NAMPT
NEAT1
NEDD4
NEK3
NFE2L2
NLRX1
NMU
NPC1
NPDC1
NRP1
NT5E
NUP210
OLFML2A
OR7A5
OSBPL10
OSBPL1A
OSBPL3
OSMR
P4HTM
PAK1
PAWR
PCDH12
PCSK6
PDE1A
PDE4DIP
PDE8A
PDGFD
PELI1
PEMT
PHACTR2
PHTF1
PICALM
PIEZO1
PILRA
PKN2
PKP4
PLAGL1
PLCB1
PLXNC1
PLXND1
PON2
PPIC
PPIP5K2
PPT1
PRKD3
PRR5L
PSG3
PSTPIP2
PTGS2
PTPN14
PTPN7
PTPRD
QPCT
R3HDM4
RAB13
RAB27A
RAI14
RALB
RANBP2
RAP1A
RAPGEF3
RAPGEF5
RASA1
RBBP8
RGCC
RGPD6///RGPD8///RGPD4///RGPD5
RGPD6///RGPD8///RGPD5
RNF44
ROBO3
RPE
RRAS
S100A11
S100A13
S100A6
SDCBP
SEC14L1
SELENBP1
SELL
SELPLG
SERPINA1
SLA
SLC11A1
SLC16A2
SLC16A7
SLC20A1
SLC22A4
SLC25A40
SLC2A5
SLC2A9
SLC31A2
SLC38A2
SLC44A1
SLC48A1
SLC4A1
SLC7A1
SLC9A3R1
SLCO2B1
SMAD3
SMCO4
SMYD2
SNX10
SNX7
SOCS2
SORL1
SPARC
SPATS2L
SPHK1
SPRED2
SRGN
SSFA2
ST18
ST5
STARD7
STC2
STEAP4
STX3
SULT1B1
SV2A
SV2B
SV2C
SYNDIG1
SYNE2
TARP
TARP///TRGC2
TBX21
TBXA2R
TBXAS1
TES
TFDP1
TIAM1
TIPARP
TJP2
TLR4
TLR5
TLR8
TM4SF1
TMCC2
TMEM106C
TMEM204
TNFRSF10C
TOX
TPT1P8
TRAC
TRAC///TRAJ17///TRAV20
TRAM2
TRD
TREM1
TRMT12
TSPO2
TTC23
TUBA4A
TUBB2A
USP12
USP15
USP6
VANGL1
VAV3
VNN2
VNN3
VSIG4
WDR11
WNK1
WWC3
WWTR1
XPO6
ZNF175
